# Supplementary material for: Changes in vitellogenin expression caused by nematodal and fungal infections in insects
Source: Oxford University Press journal article supplement (doi:10.1242/jeb.202853), 2019-01-01
Supplement: jeb202853supp.pdf [file jeb202853supp.pdf]

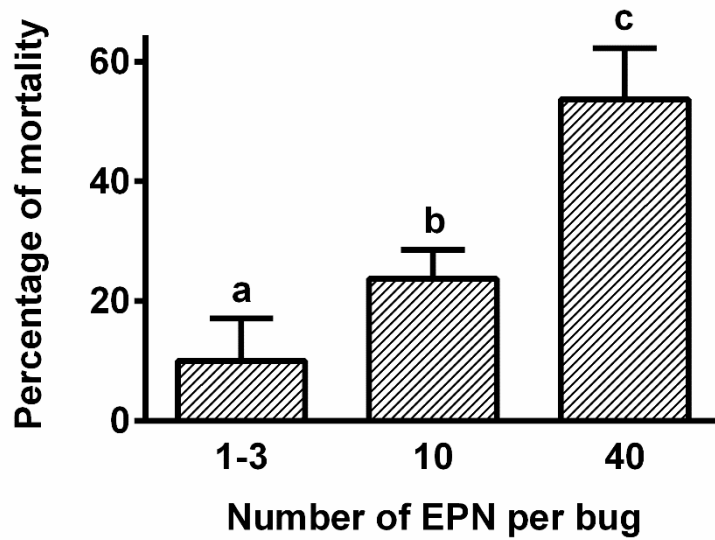

Fig. S1. The effect of various doses of *S. carpocapsae* (EPN) on mortality of *P. apterus* males (8-day old) 1 day after the treatment; mortality in controls is not shown being negligible. Statistically significant difference among infected groups at 5% level evaluated by one-way ANOVA with Tukey's post-test are indicated by different letters (n=6 groups with 20 bugs per each).

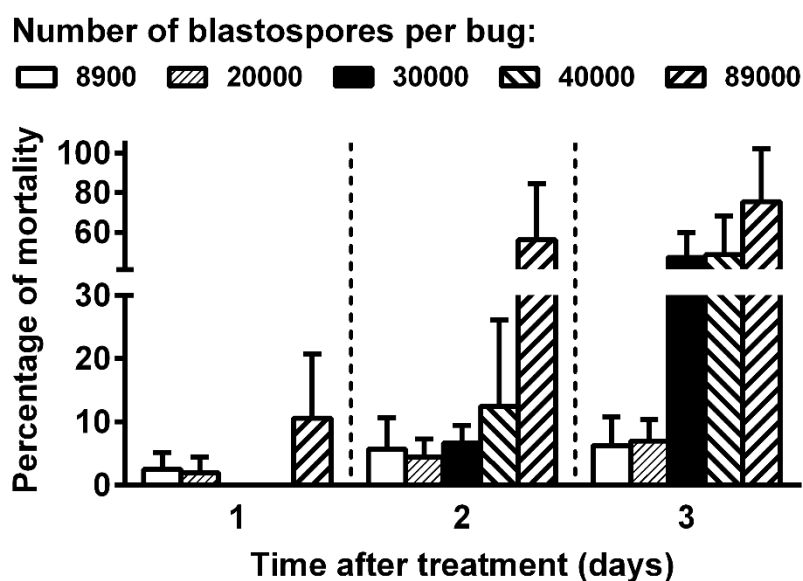

| Tukey's multiple comparisons test | 2-way ANOVA |                  |              |         |
|-----------------------------------|-------------|------------------|--------------|---------|
|                                   | Mean diff.  | 95% CI of diff.  | Significant? | Summary |
| 8900 vs. 20000                    | 0.3333      | -10.25 to 10.92  | No           | ns      |
| 8900 vs. 30000                    | -13.17      | -22.28 to -4.056 | Yes          | ***     |
| 8900 vs. 40000                    | -15.50      | -27.55 to -3.448 | Yes          | **      |
| 8900 vs. 89000                    | -42.50      | -51.91 to -33.09 | Yes          | ****    |
| 20000 vs. 30000                   | -13.50      | -21.90 to -5.101 | Yes          | ***     |
| 20000 vs. 40000                   | -15.83      | -27.36 to -4.310 | Yes          | **      |
| 20000 vs. 89000                   | -42.83      | -51.55 to -34.12 | Yes          | ****    |
| 30000 vs. 40000                   | -2.333      | -12.52 to 7.852  | No           | ns      |
| 30000 vs. 89000                   | -29.33      | -36.19 to -22.48 | Yes          | ****    |
| 40000 vs. 89000                   | -27.00      | -37.45 to -16.55 | Yes          | ****    |

Fig. S2. The effect of various doses of *I. fumosorosea* blastospores on mortality of *P. apterus* males (8-, 9- and 10-day old) 1, 2 and 3-day after the treatment; mortality in controls is not shown being null or negligible. Statistics: results of two-way ANOVA with Tukey's post-test are shown in the lower panel (n=8-10 groups with 20 bugs per each).
